# Supplementary material for: In vitro display evolution of unnatural peptides spontaneously cyclized via intramolecular nucleophilic aromatic substitutions
Source: Royal Society of Chemistry journal article supplement (doi:10.1039/d2cc00584k), 2022-01-01
Supplement: d2cc00584k1.pdf [file d2cc00584k1.pdf]

## Supplementary Information

***In vitro* display evolution of unnatural peptides spontaneously cyclized via intramolecular nucleophilic aromatic substitutions**

**Takumi Yokoyama,<sup>a,+</sup> Takehiro Ando,<sup>a,+</sup> Yukio Takamori,<sup>a,+</sup> Daisuke Fuji,<sup>a,+</sup> Masashi Sato,<sup>a</sup> Santhana Vedi,<sup>a</sup> Mizuki Yamamoto<sup>a</sup> and Takashi Kawakami<sup>\*a</sup>**

<sup>a</sup>Department of Life and Environmental Sciences, Integrated Graduate School of Medicine, Engineering, and Agricultural Sciences, University of Yamanashi, 4-4-37 Takeda, Kofu, Yamanashi 400-8510, Japan

[+] These authors contributed equally to this work.

\* E-mail address: tkawakami@yamanashi.ac.jp

## Supplemental Materials and Methods

### Activity analysis of 2-fluoro-5-nitrobenzoyl-tRNA<sup>ini</sup> and pentafluorobenzoyl-tRNA<sup>ini</sup>

*Escherichia coli* initiator tRNA (tRNA<sup>ini</sup>) was prepared by *in vitro* transcription of appropriate DNA template using T7 RNA Polymerase (RNAP) and purified by ethanol precipitation.<sup>1</sup> Preparation of acyl-tRNA<sup>ini</sup> with 2-fluoro-5-nitrobenzoic acid (FNO<sub>2</sub>Ph) and pentafluorobenzoic acid (F<sub>5</sub>Ph) cyanomethyl ester by acylation ribozyme was performed with N-cyclohexyl-2-aminoethanesulfonic acid buffer at pH 9.5 and 4°C for 24 h. FNO<sub>2</sub>Ph-tRNA<sup>ini</sup> and F<sub>5</sub>Ph-tRNA<sup>ini</sup> were purified by ethanol precipitation. Template DNA encoding model fMet-(Tyr)<sub>3</sub>-Cys-Asp-Tyr-Lys-(Asp)<sub>4</sub>-Lys peptide was PCR-amplified.<sup>1</sup> Template DNA was transcribed and translated using PURE system containing four proteinogenic amino acids (Cys, Asp, Tyr, and Lys) and FNO<sub>2</sub>Ph-tRNA<sup>ini</sup> or F<sub>5</sub>Ph-tRNA<sup>ini</sup> for 1 h at 37°C. Translation products were incubated with reverse transcription buffer at pH 8.4 for 30 min at 42°C. Expressed peptides were desalted and analyzed using Matrix Assisted Laser Desorption/Ionization-Time-of-Flight (MALDI-TOF) mass spectrometry (MS).

Template DNA encoding model fMet-(Tyr)<sub>3</sub>-His-Asp-Tyr-Lys-(Asp)<sub>4</sub>-Lys peptide was PCR-amplified. Template DNA was transcribed and translated using PURE system containing four proteinogenic amino acids (His, Asp, Tyr, and Lys) and FNO<sub>2</sub>Ph-tRNA<sup>ini</sup>, F<sub>5</sub>Ph-tRNA<sup>ini</sup>, m-chloromethylbenzoyl (mClPh)-tRNA<sup>ini</sup>, or N-chloroacetyl-N-benzylglycyl (ClAc<sup>Bn</sup>Gly)-tRNA<sup>ini</sup> for 1 h at 37°C. Translation products were incubated with reverse transcription buffer at pH 8.4 for 30 min at 42°C. Expressed peptides were desalted and analyzed using MALDI-TOF MS.

### Immobilization of PCSK9

Site-specifically biotinylated human PCSK9 was immobilized on streptavidin-modified magnetic beads. Fc-fusion protein of human PCSK9 was immobilized on Protein A-modified magnetic beads. PCSK9-immobilization was confirmed with sodium dodecyl sulfate polyacrylamide gel electrophoresis and Coomassie Brilliant Blue staining.

### SELEX of PCSK9-binding cyclic peptides by mRNA display

Eight kinds of template DNA libraries encoding 8-15 random amino acids between cyclization compounds (FNO<sub>2</sub>Ph or F<sub>5</sub>Ph) and downstream cysteine residue were prepared through PCR-amplification of template DNAs prepared by primer extension.<sup>1</sup> Prepared template DNA libraries were transcribed to mRNA libraries by run-off *in vitro* transcription using T7 RNAP. Eight kinds of prepared mRNA libraries were mixed. Libraries of mRNA-displayed FNO<sub>2</sub>Ph-cyclized or F<sub>5</sub>Ph-cyclized peptides were prepared by *in vitro* translation at 37°C for 25 min in release factor (RF)-free PURE system containing 0.5 mM of 19 proteinogenic amino acids (excluding Met), 3 μM mixed mRNA library, 3 μM puromycin-DNA linker, and 100 μM FNO<sub>2</sub>Ph-tRNA<sup>ini</sup> or F<sub>5</sub>Ph-tRNA<sup>ini</sup>. EDTA was added to mRNA-displayed FNO<sub>2</sub>Ph-cyclized and F<sub>5</sub>Ph-cyclized peptide libraries. The mRNA-displayed peptide libraries were reverse-transcribed to form double-stranded mRNA/cDNA at 42°C for 30 min using RNase H-inactivated reverse transcriptase. Reverse transcription was quenched with EDTA and neutralized with HEPES. The mRNA-displayed FNO<sub>2</sub>Ph-cyclized and F<sub>5</sub>Ph-cyclized peptide libraries were incubated with PCSK9-immobilized streptavidin-modified beads as positive selection. After supernatant was removed, beads were washed with HBS-T. cDNAs encoding peptides binding to PCSK9-immobilized beads were PCR-amplified using Taq DNA polymerase and used for next round of

SELEX. From second round, mRNA-displayed peptide libraries were prepared by *in vitro* transcription and translation in RF-free PURE system containing 19 proteinogenic amino acids (excluding Met), puromycin-DNA linker, FNO<sub>2</sub>Ph-tRNA<sup>ini</sup> or F<sub>5</sub>Ph-tRNA<sup>ini</sup>, and DNA libraries obtained from prior round. mRNA-displayed peptide libraries were reverse-transcribed and mixed with streptavidin-modified beads, and supernatant was removed. This process, called negative selection, was conducted five times to remove streptavidin-modified beads-binding peptides. After positive selection, cDNAs encoding peptides binding to PCSK9-immobilized beads were PCR-amplified. cDNAs were quantified using SYBR green-based qPCR. After final round of SELEX, libraries were sequenced by Sanger method or next-generation sequencing. Template focused DNA libraries for *in vitro* affinity maturation were prepared by PCR-amplification of template DNAs prepared by primer extension. The prepared template focused DNA libraries were transcribed to focused mRNA libraries by *in vitro* transcription using T7 RNAP.

### **PCSK9-binding analysis of cloned mRNA-displayed cyclic peptides**

Template clone DNAs encoding peptide were PCR-amplified using Taq DNA polymerase. Cloned mRNA-displayed FNO<sub>2</sub>Ph-cyclized and F<sub>5</sub>Ph-cyclized peptides were prepared by transcription and translation at 37°C for 25 minutes using PURE system containing template clone DNA, puromycin-DNA linker, and FNO<sub>2</sub>Ph-tRNA<sup>ini</sup> or F<sub>5</sub>Ph-tRNA<sup>ini</sup>. Cloned mRNA-displayed FNO<sub>2</sub>Ph-cyclized and F<sub>5</sub>Ph-cyclized peptides were reverse-transcribed, pulled down with PCSK9-immobilized beads and analyzed by quantification of cDNA using SYBR green-based qPCR.

### **Chemical peptide synthesis**

Peptides with C-terminal biocytin were synthesized using standard solid-phase peptide synthesis with 9-fluorenylmethyloxycarbonyl (Fmoc)-protected amino acids on Rink amide resin. Amino acid coupling, FNO<sub>2</sub>Ph coupling and F<sub>5</sub>Ph coupling were performed using HBTU, HOBT, and DIEA. Peptides were deprotected and cleaved from resin using a mixture of H<sub>2</sub>O, triisopropylsilane, 3,6-dioxa-1,8-octanedithiol, and trifluoroacetic acid. Cleaved peptides were filtered from resin, precipitated by centrifugation in diethyl ether and dried *in vacuo*. Linear peptides were cyclized by triethylamine in DMF, analyzed by MALDI-TOF MS and quantified by measuring absorbance at 280 nm using microspectrometer.

Chemical dimers of FNO<sub>2</sub>Ph-cyclized peptides were synthesized using N- $\alpha,\epsilon$ -di-Fmoc-L-lysine. Amino acid coupling, FNO<sub>2</sub>Ph coupling and F<sub>5</sub>Ph coupling were performed using HATU, HOAt and DIEA. Peptides were deprotected, cleaved, cyclized, analyzed by MALDI-TOF MS and quantified according to the above-mentioned method.

### **PCSK9-binding analysis of chemically synthesized cyclic peptides**

Chemically synthesized biotinylated cyclic peptides were mixed with streptavidin-horseradish peroxidase (HRP) conjugate. Peptide-HRP complex was pulled down with PCSK9-immobilized beads. HRP substrate was added to PCSK9-pull-downed beads, and chemiluminescence was detected using LuminoGraph III (ATTO).

Chemically synthesized biotinylated cyclic peptides were immobilized on streptavidin-modified magnetic beads. His-tagged PCSK9 was mixed with anti-His-tag antibody-HRP conjugate. PCSK9-HRP complex was pulled down with peptide-immobilized beads. HRP substrate was added to

peptide-pull-downed beads, and chemiluminescence was detected using LuminoGraph III (ATTO).

#### **PCSK9-detection with chemically synthesized PCSK9-binding cyclic peptides on PVDF membrane**

Chemically synthesized biotinylated peptides were mixed with streptavidin-HRP conjugate. PCSK9 was spotted on PVDF membrane. Blocking of the PVDF membrane was performed using 5% BSA in TBS-T. The PVDF membrane was incubated with peptide-HRP complexes and washed three times using TBS-T. HRP substrate was added to the PVDF membrane, and chemiluminescence was detected using LuminoGraph III (ATTO).

#### **Fluorescent imaging of PCSK9 on beads with chemically synthesized PCSK9-binding cyclic peptides**

Chemically synthesized biotinylated cyclic peptides were mixed with streptavidin-Qdot 605 conjugate. Peptide-Qdot complexes were pulled down with PCSK9-immobilized beads. Qdot 605 fluorescence was imaged using fluorescence microscope (Leica).

#### **Sandwich ELISA of PCSK9 with chemically synthesized PCSK9-binding cyclic peptides and anti-PCSK9 antibody**

Anti-PCSK9 antibody was immobilized on Protein G-modified magnetic beads. The anti-PCSK9 antibody-immobilized beads were incubated with PCSK9 on ice for 10 min. Chemically synthesized biotinylated cyclic peptides were mixed with streptavidin-HRP conjugate. Peptide-HRP complexes were pulled down with the PCSK9-immobilized anti-PCSK9-beads. HRP substrate was added to pull-downed beads, and chemiluminescence was detected using LuminoGraph III (ATTO).

#### **Determination of PCSK9-binding dissociation constant ( $K_D$ ) by the Bio-layer Interferometry assay**

PCSK9 binding kinetics was assayed by Bio-layer interferometry (BLI) using BLItz (ForteBio, Fremont, CA, USA) and performed according to the ForteBio's protocol. Chemically synthesized biotinylated PCSK9-binding peptides were immobilized on a streptavidin (SA) biosensor that had been hydrated for 10 minutes. His-tagged PCSK9 was diluted in HBS-T to a range of concentration (2000 nM–125 nM) for analytes. Each step in the binding kinetics assay was as follows: immobilization of peptides to SA biosensor for 150 s, association (binding of peptides to PCSK9) for 150 s, and dissociation for 150 s.

## Supplemental Figures

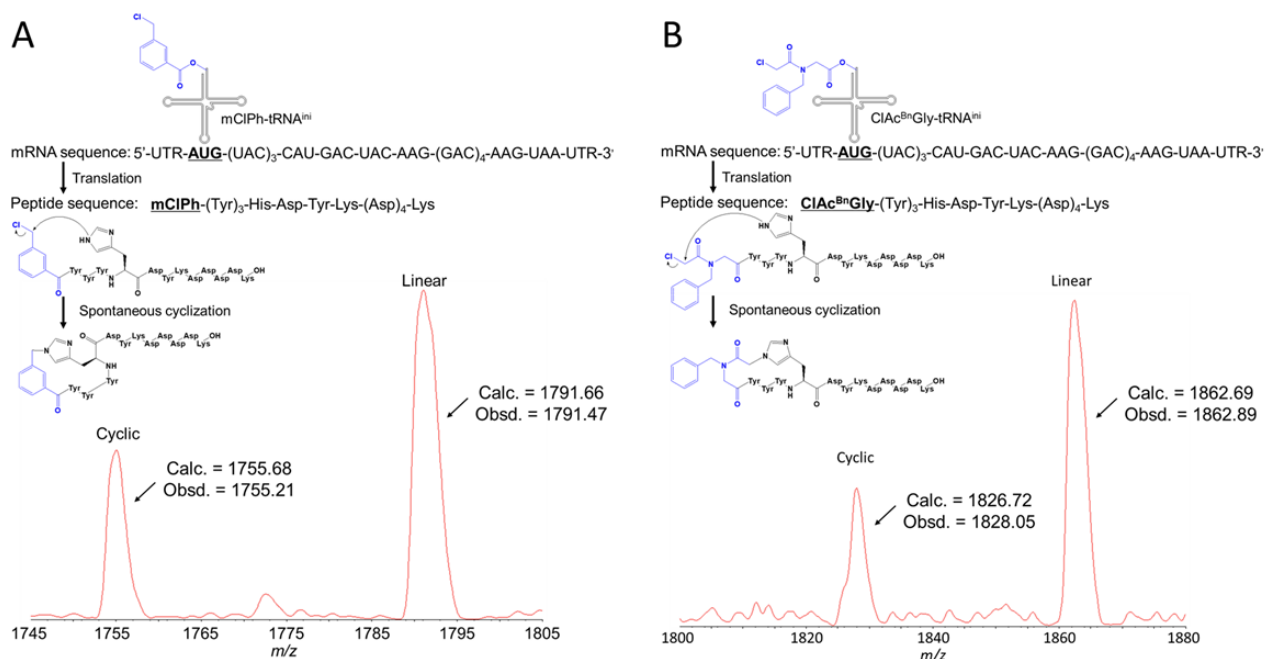

Fig. S1

Translation initiation with *m*-chloromethylbenzoic acid (mCIPh) (A) and *N*-chloroacetyl-*N*-benzylglycine (ClAc<sup>Bn</sup>Gly) (B) charged onto tRNA<sup>ini</sup> to express mCIPh- and ClAc<sup>Bn</sup>Gly-initiated histidine-containing model peptides using PURE system and subsequent peptide cyclization with downstream histidine residue; MALDI-TOF mass spectrum of mCIPh- and ClAc<sup>Bn</sup>Gly-initiated (linear) and cyclized (cyclic) peptides. Calculated (Calc.) and Observed (Obsd.) m/z for singly charged species [M+H]<sup>+</sup> of linear and cyclic peptides are shown.

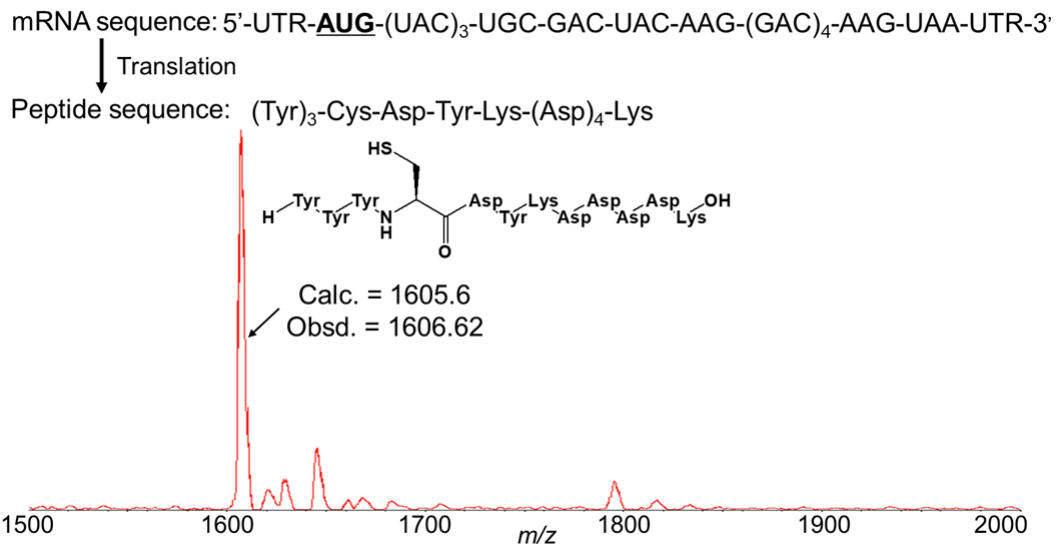

Fig. S2

Translation initiation in the absence of acyl-tRNA<sup>ini</sup> to express a negative control cysteine-containing model peptide using PURE system; MALDI-TOF mass spectrum of the peptide. Calculated (Calc.) and Observed (Obsd.) m/z for singly charged species [M+H]<sup>+</sup> of the peptide are shown.

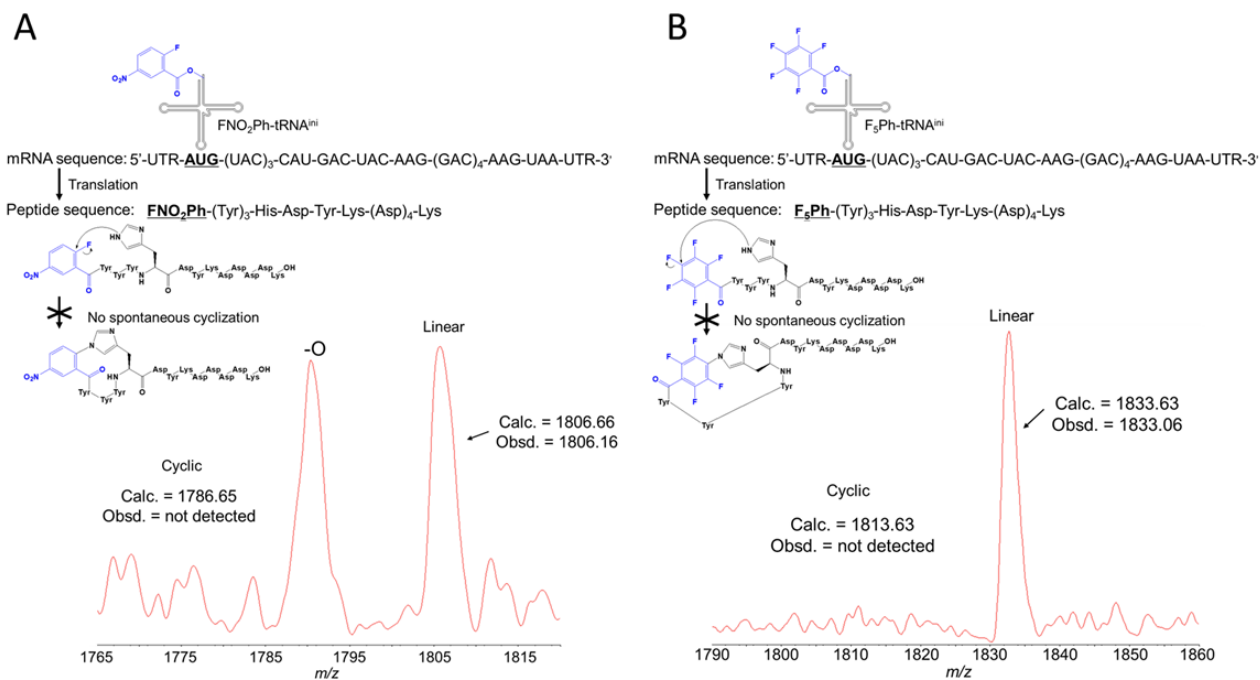

Fig. S3

Translation initiation with FNO<sub>2</sub>Ph and F<sub>5</sub>Ph charged onto tRNA<sup>ini</sup> to express FNO<sub>2</sub>Ph- and F<sub>5</sub>Ph-initiated histidine-containing model peptides using PURE system; MALDI-TOF mass spectrum of FNO<sub>2</sub>Ph- and F<sub>5</sub>Ph-initiated (linear) peptides. Calculated (Calc.) and Observed (Obsd.) m/z for singly charged species [M+H]<sup>+</sup> of peptides are shown. -O indicates 2-fluoro-5-nitroso-benzoic acid-initiated peptide generated by photodecomposition of NO<sub>2</sub> to NO during the MALDI-TOF MS analysis.

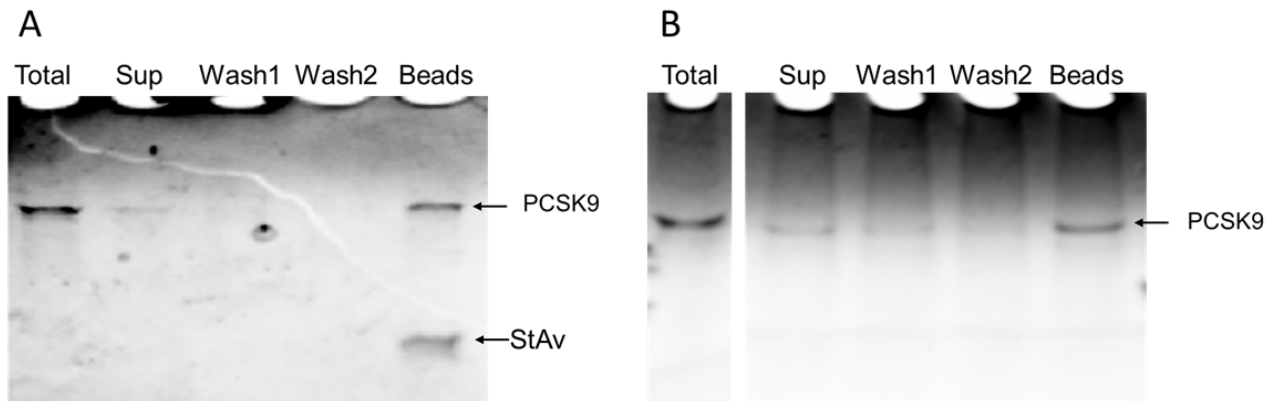

Fig. S4

Immobilization of PCSK9-Avi-His and PCSK9-Fc on beads confirmed by visualizing the protein using CBB staining after SDS-PAGE. (A) PCSK9-Avi-His, site-specifically biotinylated PCSK9 with a C-terminal Avi tag followed by polyhistidine tag was immobilized on streptavidin (StAv) beads. (B) PCSK9-Fc, PCSK9 with a C-terminal Fc region of mouse IgG1 was immobilized on Protein A beads.



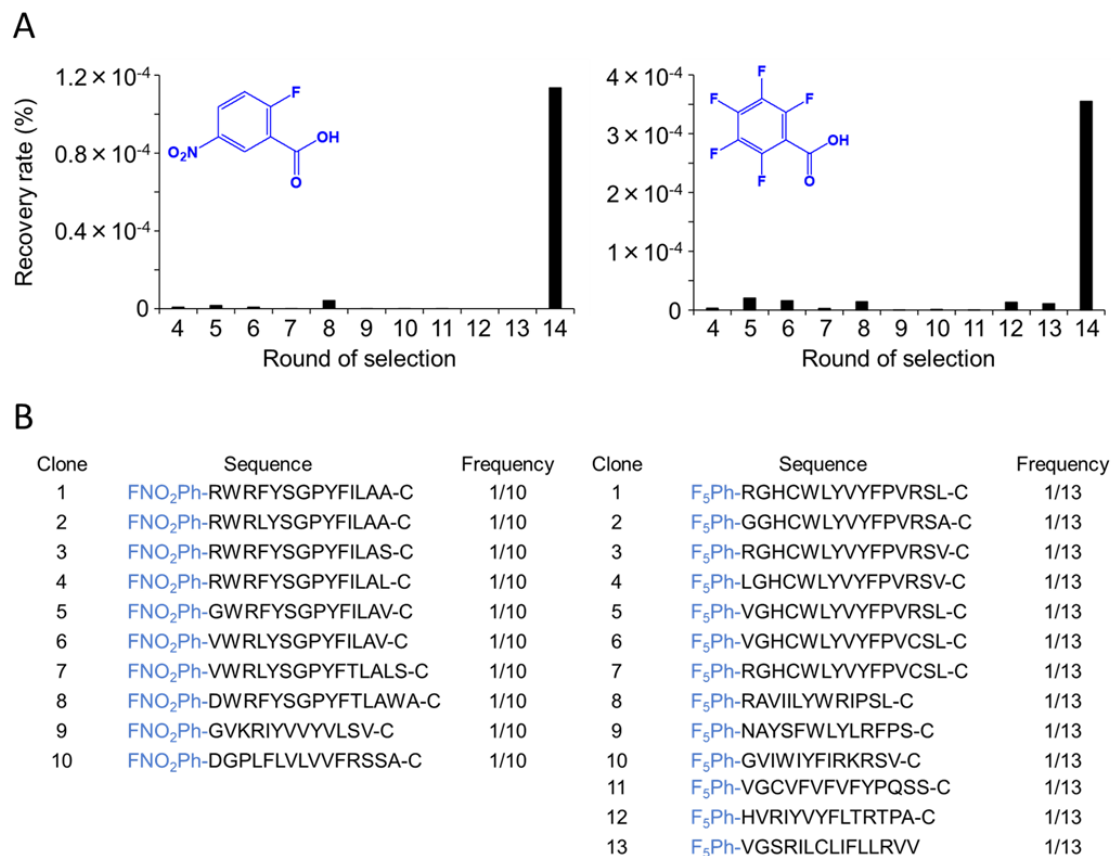

Fig. S5

(A) Progress during SELEX of FNO<sub>2</sub>Ph-cyclized (left) and F<sub>5</sub>Ph-cyclized (right) peptides against PCSK9. The recovery of cDNAs in each round of SELEX was determined by RT-qPCR. (B) Peptide sequences identified by cloning and sequencing of DNA library in the final SELEX round.

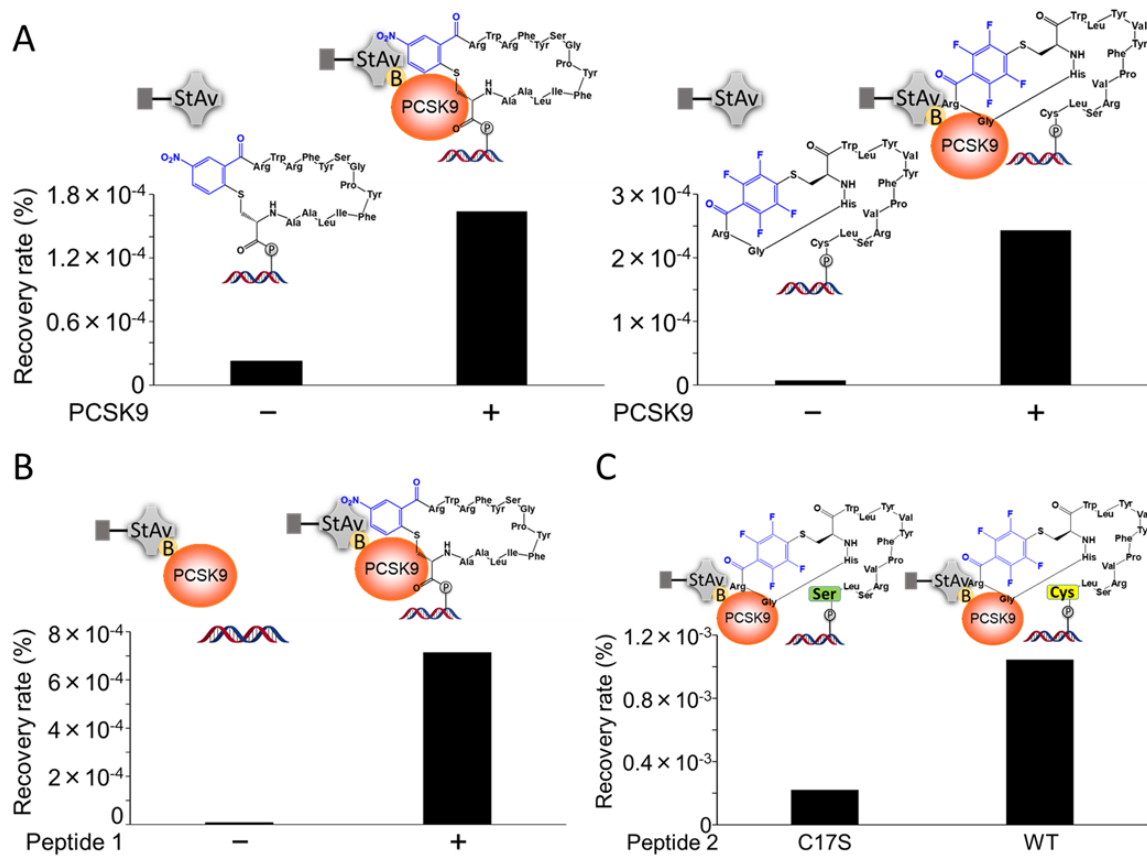

Fig. S6

PCSK9-binding analysis of mRNA-displayed FNO<sub>2</sub>Ph-cyclized peptide 1 and F<sub>5</sub>Ph-cyclized peptide 2 identified by SELEX. (A) PCSK9-binding analysis of mRNA-displayed FNO<sub>2</sub>Ph-cyclized peptide 1 and F<sub>5</sub>Ph-cyclized peptide 2 by quantification of cDNA recovered after pull-down with PCSK9-immobilized or nonimmobilized beads using qPCR. (B) PCSK9-binding analysis of mRNA-displayed FNO<sub>2</sub>Ph-cyclized peptide 1 by quantification of cDNA recovered after PCSK9-pull-down with translation or without translation using qPCR. (C) PCSK9-binding analysis of mRNA-displayed F<sub>5</sub>Ph-cyclized peptide 2 and C17S mutant by quantification of cDNA recovered after PCSK9-pull-down using qPCR.

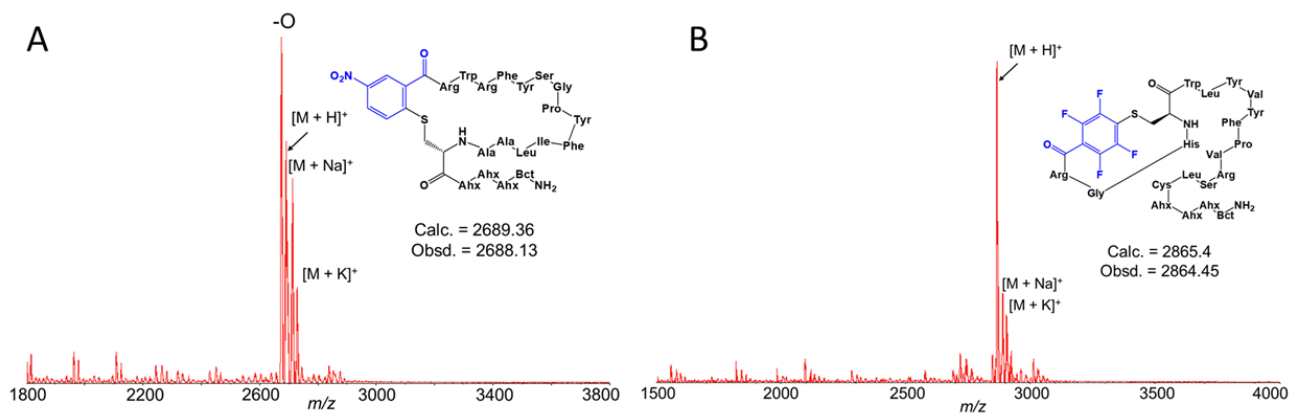

Fig. S7

MALDI-TOF MS of chemically synthesized FNO<sub>2</sub>Ph-cyclized peptide 1 (A) and F<sub>5</sub>Ph-cyclized peptide 2 (B) with C-terminal biocytin (Bct). Calculated (Calc.) and Observed (Obsd.) m/z for singly charged species [M + H]<sup>+</sup> of the desired peptides are shown. -O indicates nitroso-benzoic acid-cyclized peptide generated by photodecomposition of NO<sub>2</sub> to NO during the MALDI-TOF MS analysis.

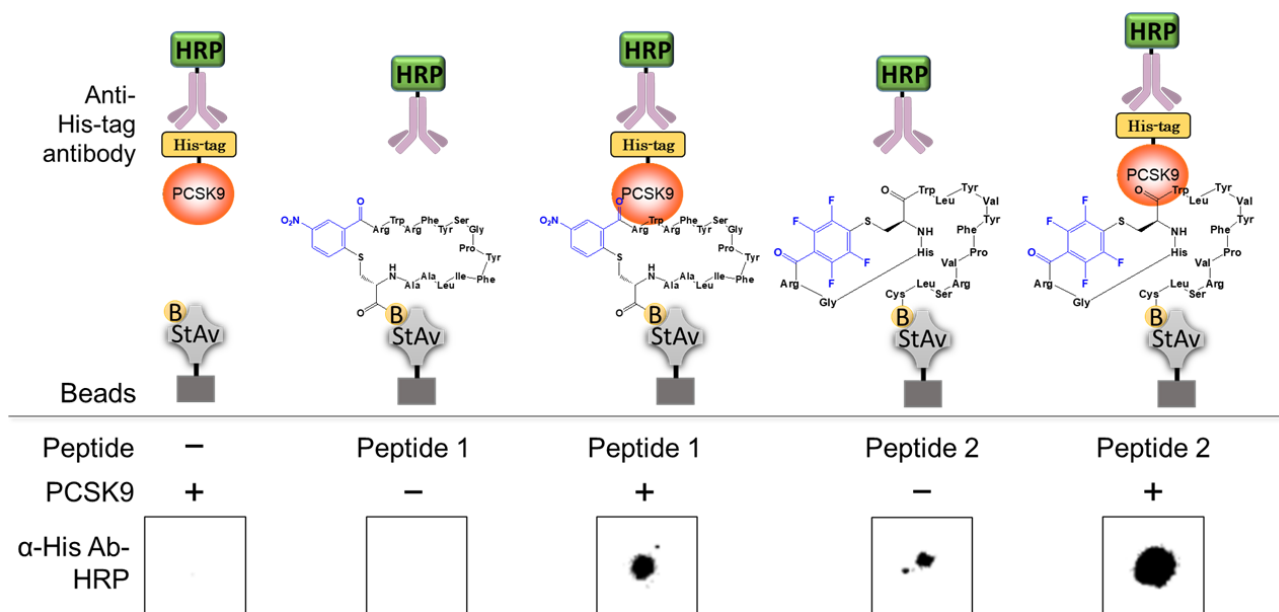

Fig. S8

PCSK9-binding analysis of FNO<sub>2</sub>Ph-cyclized peptide 1 and F<sub>5</sub>Ph-cyclized peptide 2 by peptide-pull-down of PCSK9 and chemiluminescent detection using HRP-labeling of PCSK9 via anti-His-tag antibody (α-His Ab).

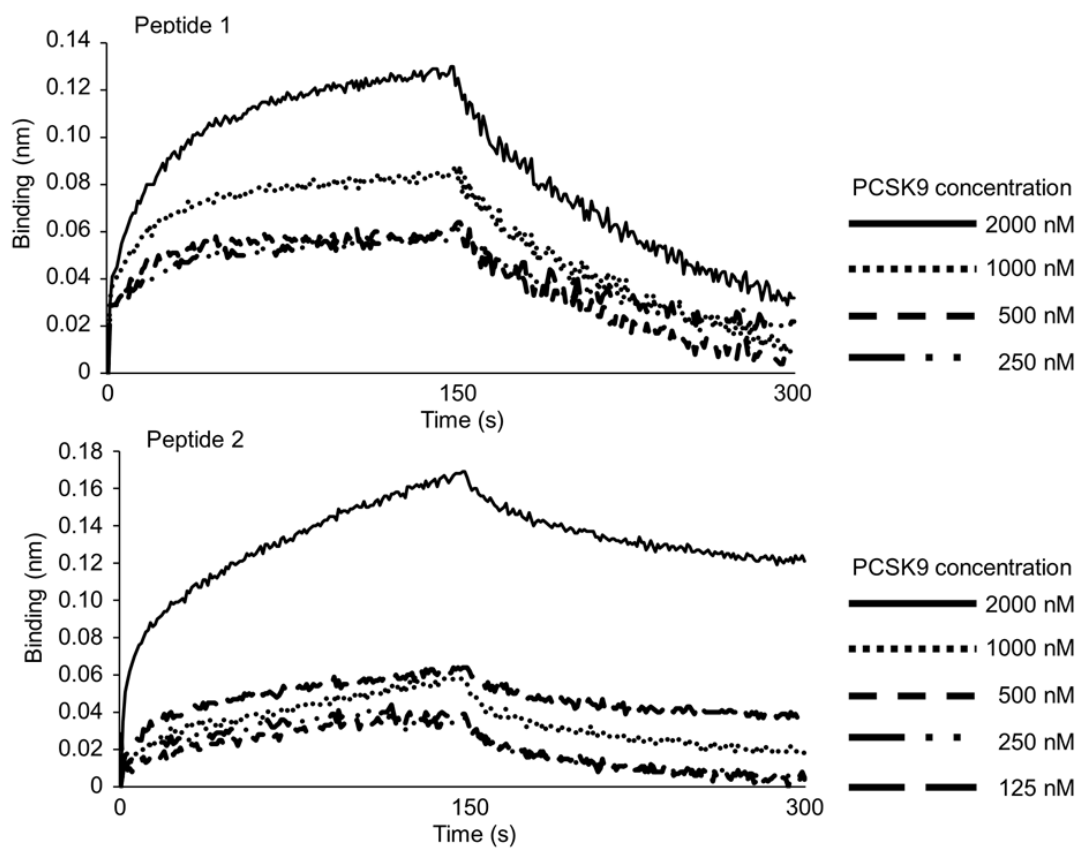

Fig. S9

PCSK9-binding kinetics of FNO<sub>2</sub>Ph-cyclized peptide 1 and F<sub>5</sub>Ph-cyclized peptide 2 was analyzed using the BLI assay. Representative sensorgrams obtained using BLI are shown. The dissociation constants ( $K_D$ ) of the PCSK9-binding peptides were determined from the resulting BLI sensorgrams.

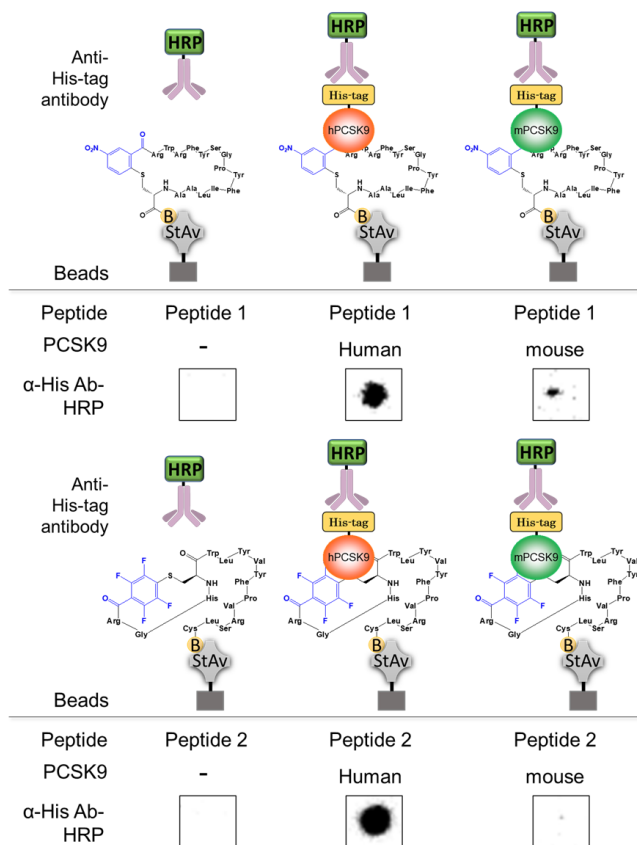

Fig. S10

PCSK9-binding analysis of FNO<sub>2</sub>Ph-cyclized peptide 1 and F<sub>5</sub>Ph-cyclized peptide 2 by peptide-pull-down of human PCSK9 and mouse PCSK9 and chemiluminescent detection using HRP-labeling of PCSK9 via anti-His-tag antibody (α-His Ab).

**A**

|                              |                                                                                                                    |
|------------------------------|--------------------------------------------------------------------------------------------------------------------|
| <b>Original sequence</b>     | <b>FNO<sub>2</sub>Ph - Arg - Trp - Arg - Phe - Tyr - Ser - Gly - Pro - Tyr - Phe - Ile - Leu - Ala - Ala - Cys</b> |
| <b>N-terminal randomized</b> | <b>FNO<sub>2</sub>Ph - X - X - X - X - X - X - X - Pro - Tyr - Phe - Ile - Leu - Ala - Ala - Cys</b>               |
| <b>C-terminal randomized</b> | <b>FNO<sub>2</sub>Ph - Arg - Trp - Arg - Phe - Tyr - Ser - Gly - X - X - X - X - X - X - X - Cys</b>               |

**B**

| Clone | Sequence                             | Frequency  |
|-------|--------------------------------------|------------|
| 1     | FNO <sub>2</sub> Ph-RWRFYSGMRNREMD-C | 3513/12615 |
| 2     | FNO <sub>2</sub> Ph-RWRLYSGM         | 1936/12615 |
| 3     | FNO <sub>2</sub> Ph-RWRFYSGHKQEMDS-C | 595/12615  |
| 4     | FNO <sub>2</sub> Ph-RWRFYSGGTKEMEY-C | 438/12615  |
| 5     | FNO <sub>2</sub> Ph-RWRFYSGMRNREMA-C | 276/12615  |
| 6     | FNO <sub>2</sub> Ph-RWRFYSGMRKUEMD-C | 175/12615  |
| 7     | FNO <sub>2</sub> Ph-RWRFYSGUEMDSV    | 162/12615  |
| 8     | FNO <sub>2</sub> Ph-RWRFYSGRQKEMDV-C | 153/12615  |
| 9     | FNO <sub>2</sub> Ph-RWRFYSGEPEREMA-C | 150/12615  |

**C** Peptide 3 sequence: **FNO<sub>2</sub>Ph - Arg - Trp - Arg - Phe - Tyr - Ser - Gly - Ile - Arg - Asn - Arg - Glu - Ile - Asp - Cys**

Fig. S11

*In vitro* affinity maturation of PCSK9-binding FNO<sub>2</sub>Ph-cyclized peptide 1 by SELEX using mRNA-displayed focused libraries expressed by the PURE system. (A) Sequences of N and C-terminal randomized focused library. X represents random proteinogenic amino acids, excluding methionine. (B) Alignment of sequences obtained by NGS at the final SELEX round from the C-terminal randomized library. The most frequent sequence is shown above the graph. (C) Peptide 3 with the most frequent sequence determined by alignment analysis of the C-terminal randomized library at the final SELEX round.

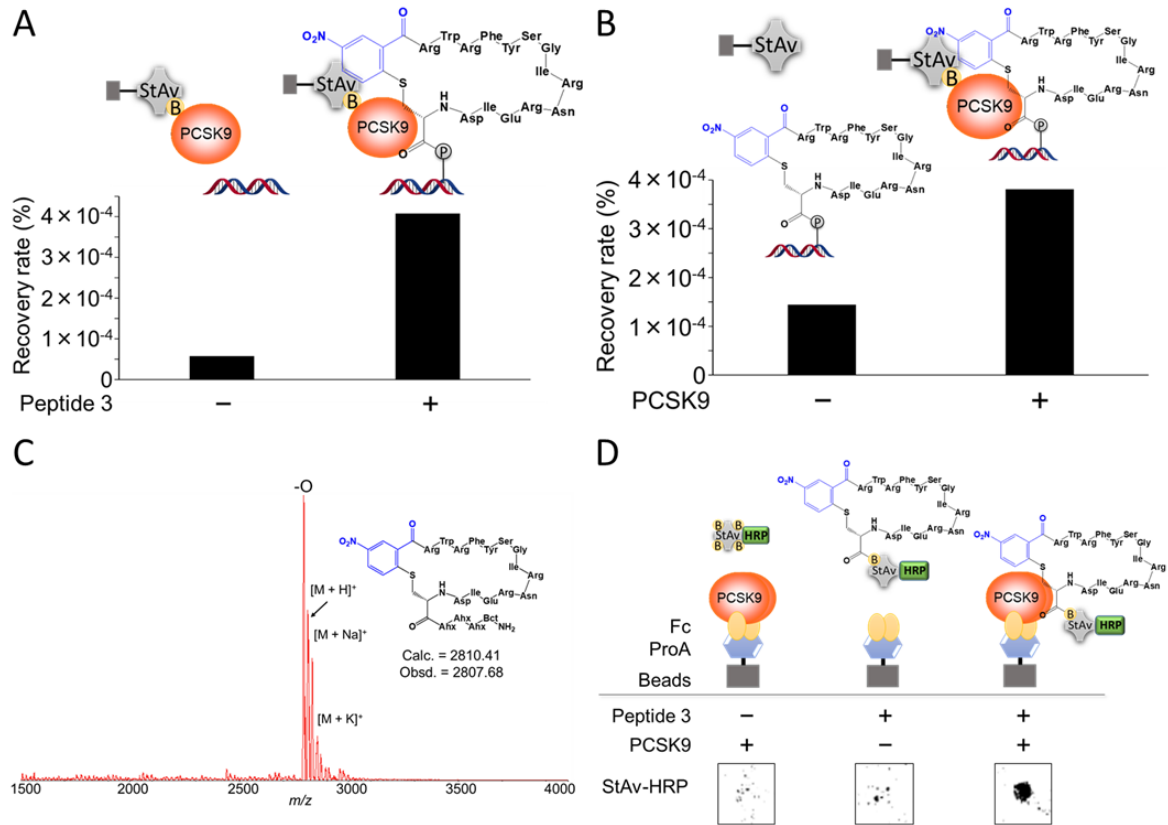

Fig. S12

PCSK9-binding analysis of unnatural FNO<sub>2</sub>Ph peptide 3 identified by *in vitro* affinity maturation. (A) and (B) PCSK9-binding of mRNA-displayed FNO<sub>2</sub>Ph-cyclized peptide 3 was analyzed by cDNA quantification after pull-down using qPCR. (C) MALDI-TOF MS of chemically synthesized FNO<sub>2</sub>Ph-cyclized peptide 3 with C-terminal biocytin (Bct). Calculated (Calc.) and Observed (Obsd.) m/z for singly charged species [M + H]<sup>+</sup> of the desired peptide are shown. -O indicates nitroso-benzoic acid-cyclized peptide generated by photodecomposition of NO<sub>2</sub> to NO during the MALDI-TOF MS analysis. (D) PCSK9-binding of chemically synthesized FNO<sub>2</sub>Ph-cyclized peptide 3 was assayed by PCSK9-pull-down and chemiluminescence detection using HRP-labeling via streptavidin (StAv).



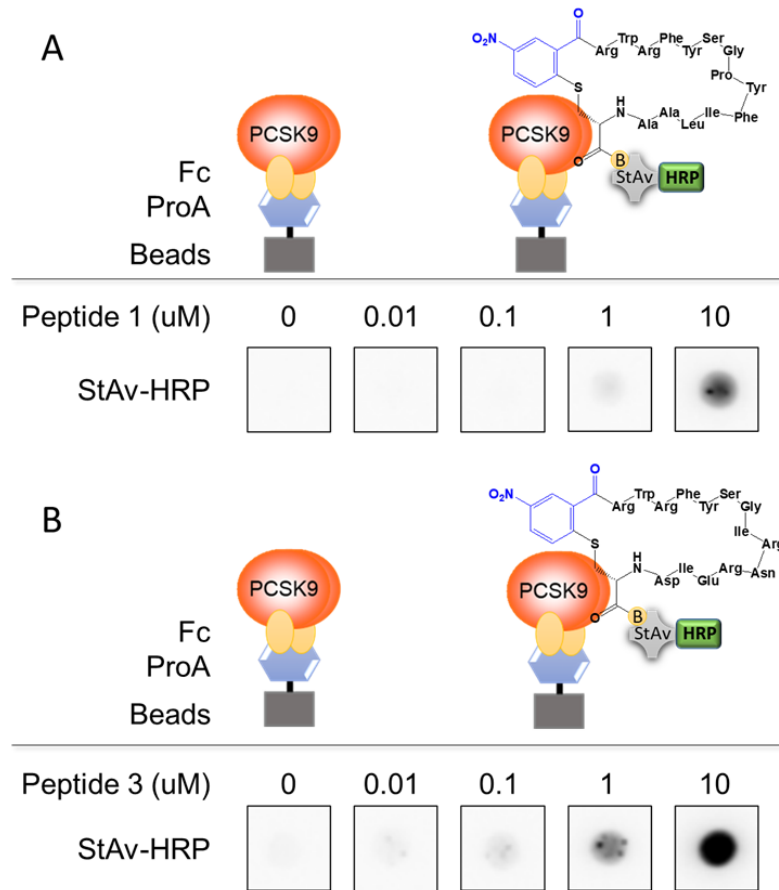

Fig. S13

Titration of PCSK9-binding FNO<sub>2</sub>Ph-cyclized peptides 1 (A) and 3 (B) in the PCSK9-pull-down and chemiluminescence detection using HRP-labeling of the peptides.

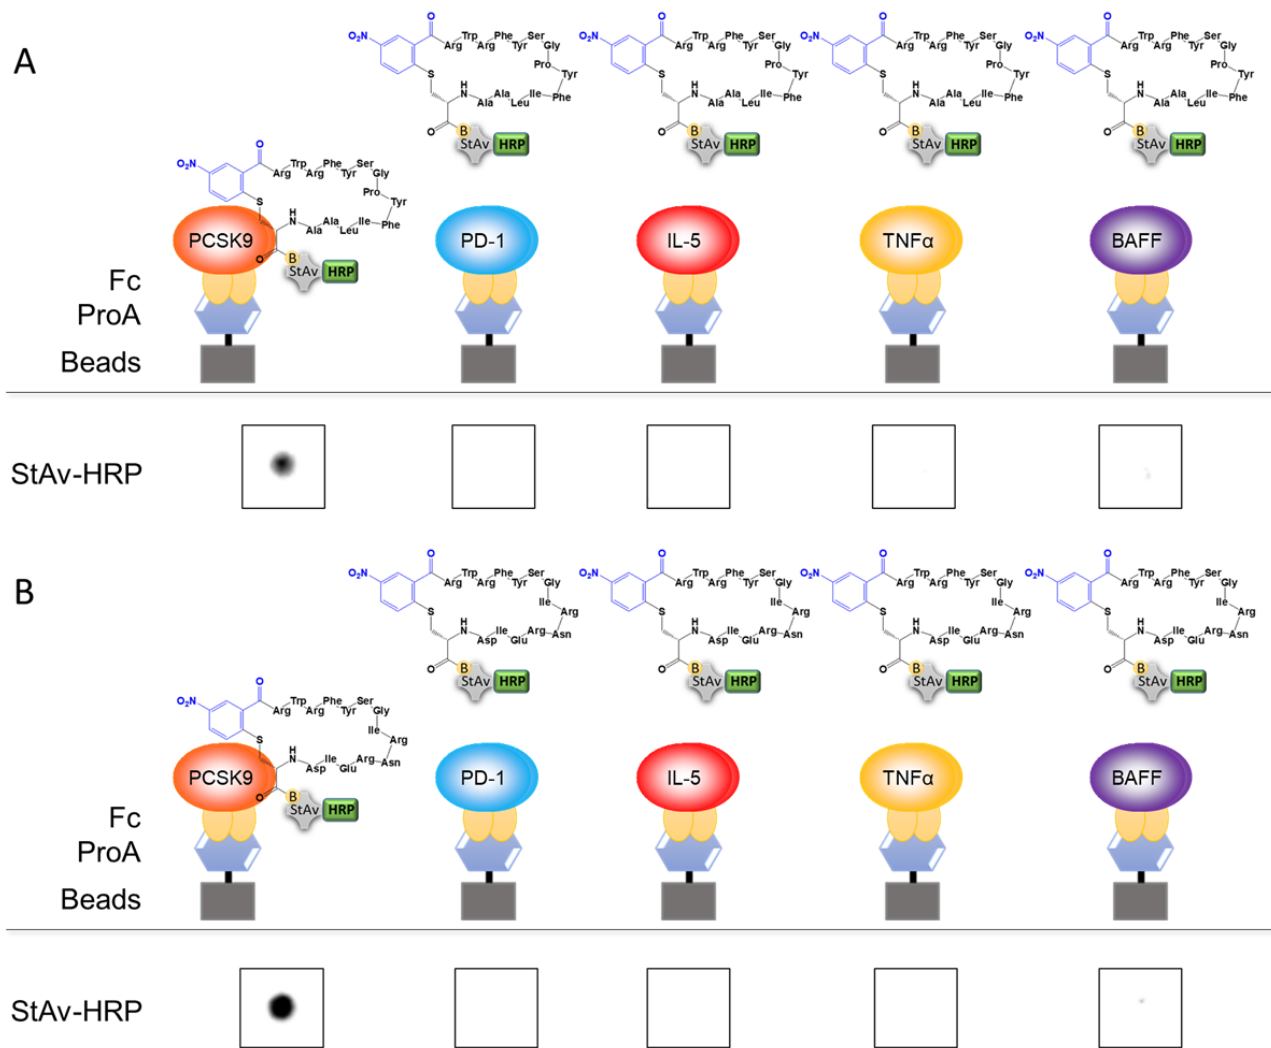

Fig. S14

Target-specificity of PCSK9-binding FNO<sub>2</sub>Ph-cyclized peptides 1 (A) and 3 (B) assayed by the various protein-pull-down and chemiluminescence detection using HRP-labeling of the peptides.

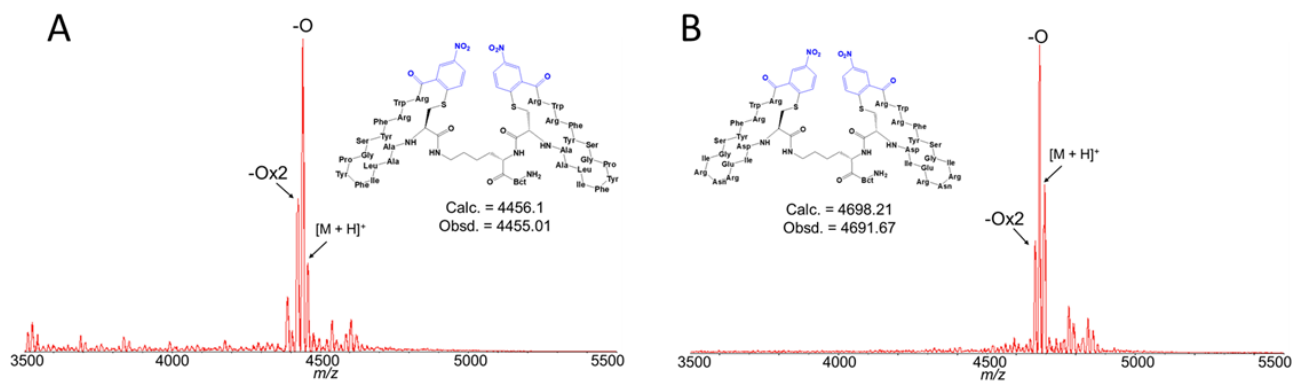

Fig. S15

MALDI-TOF MS of chemically synthesized dimers of FNO<sub>2</sub>Ph-cyclized peptides 1 (A) and 3 (B) with C-terminal biocytin (Bct). Calculated (Calc.) and Observed (Obsd.) m/z for singly charged species [M + H]<sup>+</sup> of the desired peptide are shown. -O and -Ox2 indicate nitroso-benzoic acid-cyclized peptide generated by photodecomposition of one and two NO<sub>2</sub> to NO, respectively, during the MALDI-TOF MS analysis.

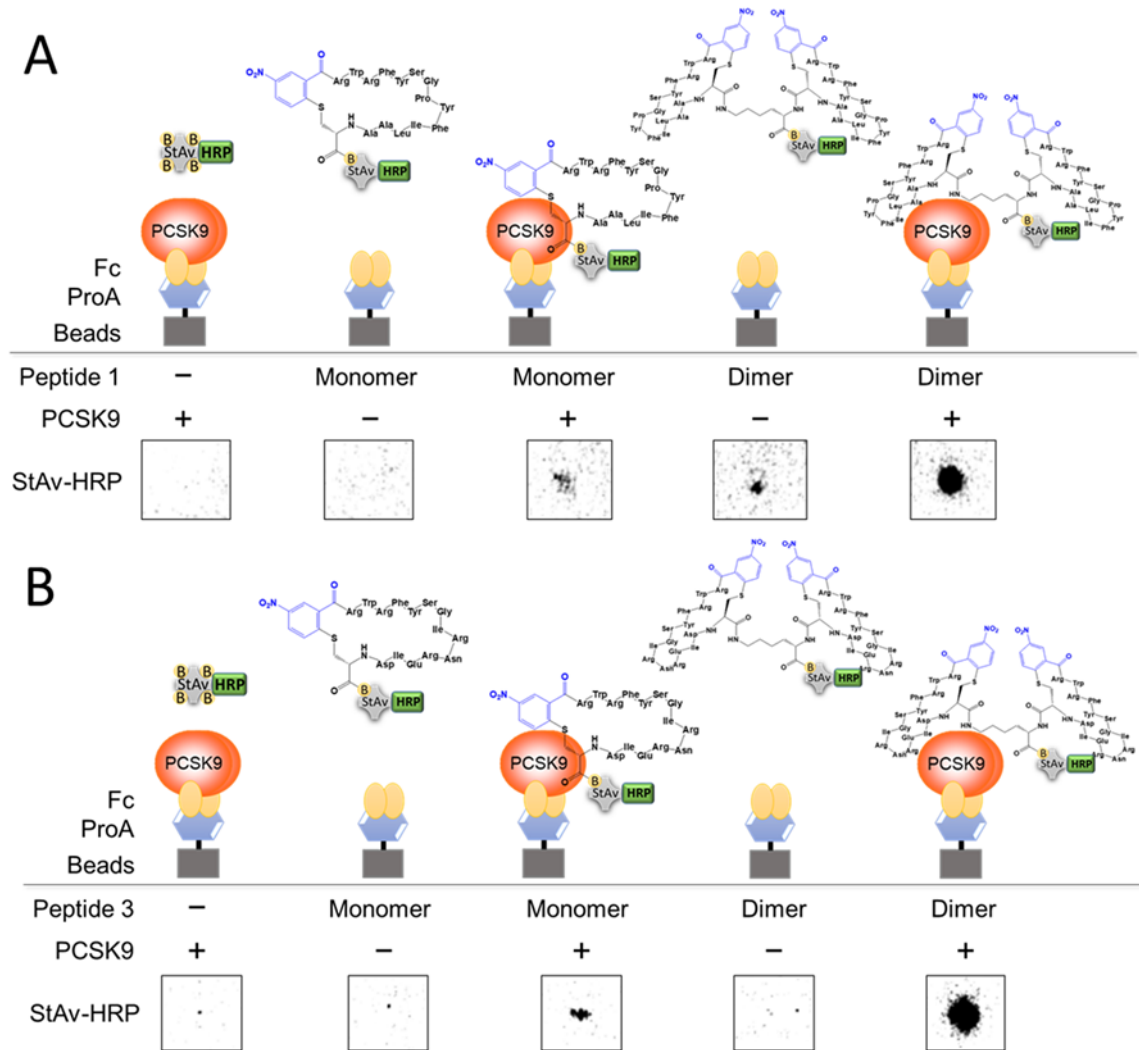

Fig. S16

(A) and (B) PCSK9-binding of chemically synthesized dimers of FNO<sub>2</sub>Ph-cyclized peptides 1 and 3 was assayed by PCSK9-pull-down and chemiluminescence detection using HRP-labeling via streptavidin (StAv).

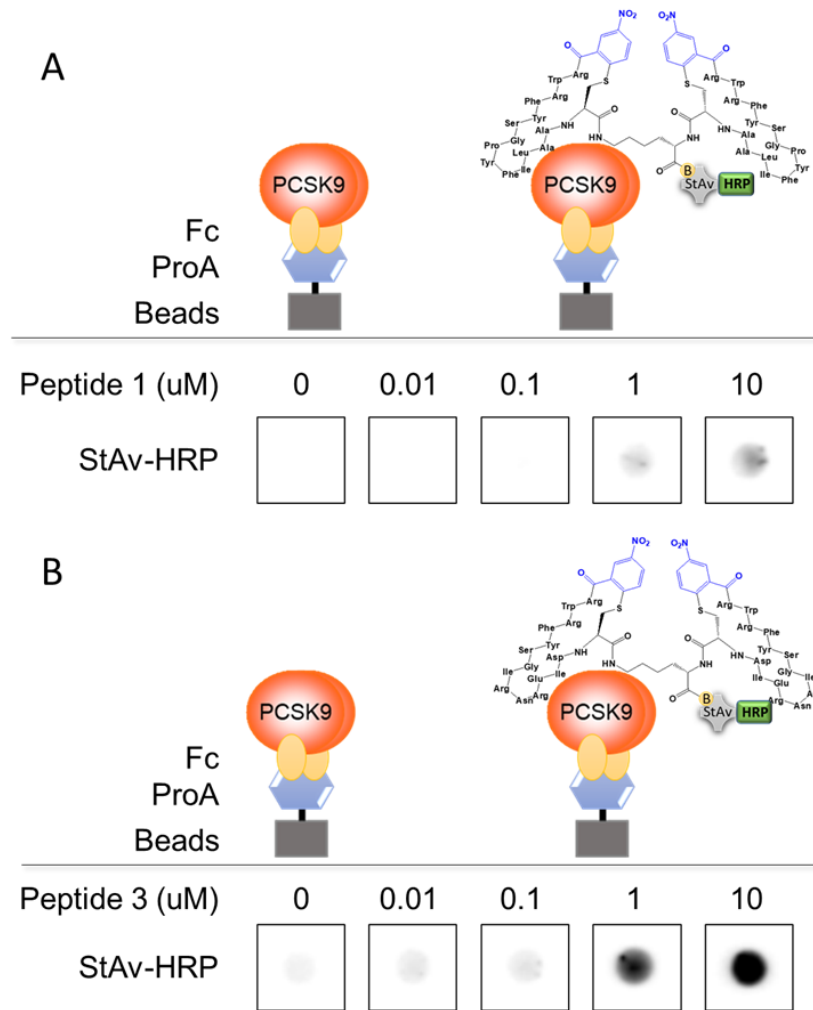

Fig. S17

Titration of dimeric PCSK9-binding FNO<sub>2</sub>Ph-cyclized peptides 1 (A) and 3 (B) in the PCSK9-pull-down and chemiluminescence detection using HRP-labeling of the dimeric peptides.

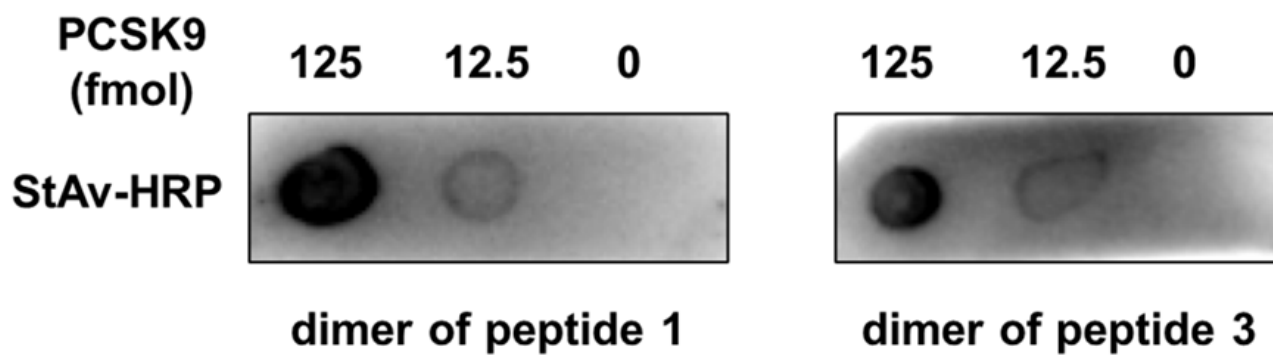

Fig. S18

Dot blotting of PCSK9 detected with chemical dimers of FNO<sub>2</sub>Ph-cyclized peptides 1 and 3 by chemiluminescence using HRP-labeling of peptides via streptavidin (StAv).

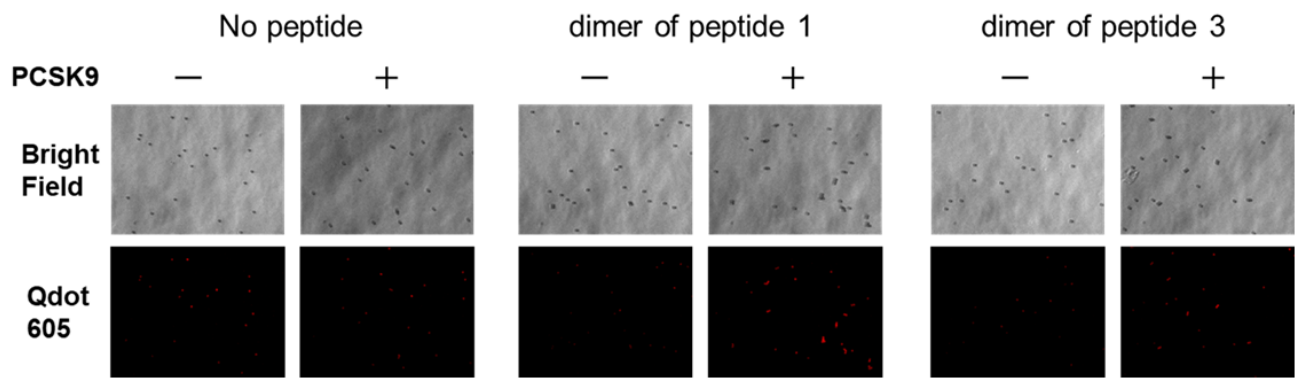

Fig. S19

Fluorescent images of PCSK9 immobilized on beads by chemical dimers of FNO<sub>2</sub>Ph-cyclized peptides 1 and 3 labeled with Qdot 605 via streptavidin.

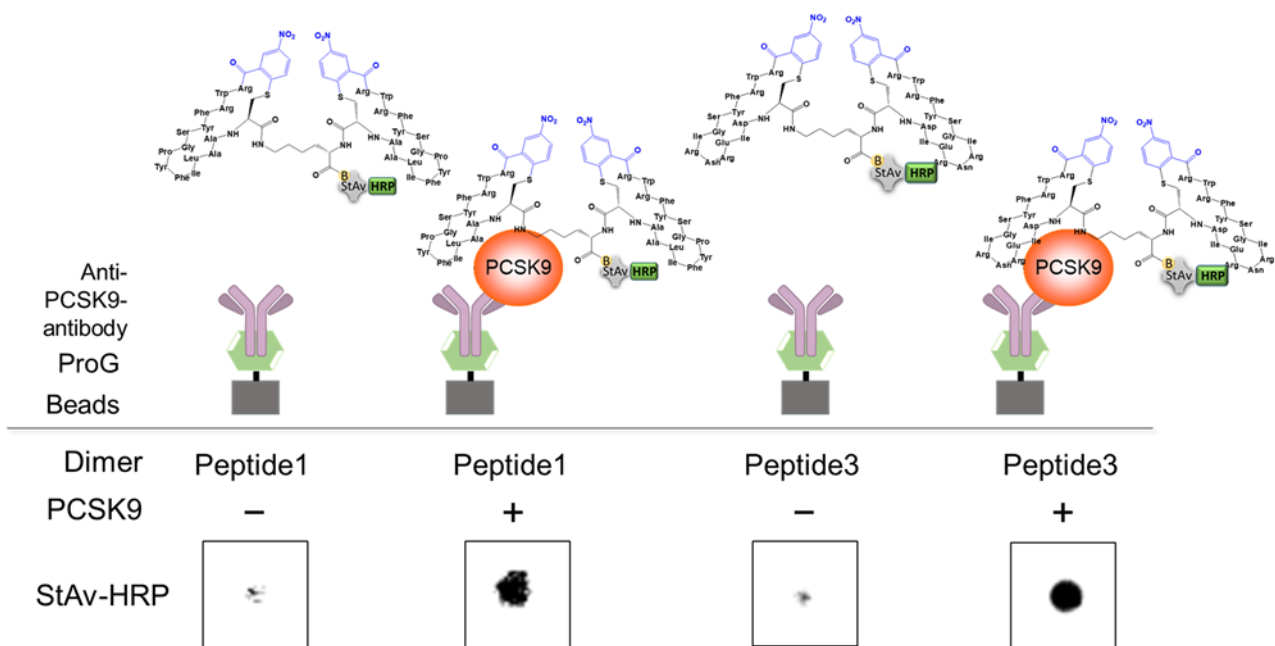

Fig. S20

Sandwich ELISA of PCSK9 with anti-PCSK9 antibody and chemical dimers of FNO<sub>2</sub>Ph-cyclized peptides 1 and 3 detected by chemiluminescence using HRP-labeling of peptides via streptavidin (StAv).



## Supplemental References

1. T. Kawakami, K. Ogawa, T. Hatta, N. Goshima and T. Natsume, *ACS Chem Biol*, 2016, **11**, 1569-1577.
